# Supplementary material for: Long intergenic non-coding RNA 00152 promotes lung adenocarcinoma proliferation via interacting with EZH2 and repressing IL24 expression
Source: Mol Cancer. 2017 Jan 21;16:17. doi: 10.1186/s12943-017-0581-3 (PMC5251237; doi:10.1186/s12943-017-0581-3)
Supplement: Additional file 1: Table S2. — Primer sequences. (XLSX 13 kb) [file 12943_2017_581_MOESM1_ESM.xlsx]

## Sheet: Sheet1
qPCR primers					ChIP qPCR primers				siRNA sequence
GAPDH F	GGGAGCCAAAAGGGTCAT				IL24 F1	TGGGCCAAGGTTCCTAGGTT			LINC00152 1#	CAGGGAAUCUUUCAGCUGGAUUCCG
GAPDH R	GAGTCCTTCCACGATACCAA				IL24 R1	GGGTACACCTGGGATCGTGA				CGGAAUGCAGCUGAAAGAUUCCCUG
LINC00152 F	CACTGAAAATCACGACTCC				IL24 F2	TCTGGAGGGTAAGACTCGGG			LINC00152 2#	UGAUCGAAUAUGACAGACACCGAAA
LINC00152 R	AAATGGGAAACCGACCAGAC				IL24 R2	AACACACCCTTGGCAGACTC				UUUCGGUGUCUGUCAUAUUCGAUCA
U6 F	CTCGCTTCGGCAGCACA				IL24 F3	CTGTGTCCCCTGAGTGGTTC			LINC00152 3#	UCUAUGUGUCUUAAUCCCUUGUCCU
U6 R	AACGCTTCACGAATTTGCGT				IL24 R3	CCTGACATGCAGCTACCCAT				AGGACAAGGGAUUAAGACACAUAGA
DUSP6-F	CTGGAACGAGAATACGGGCG								siEZH2	GAGGUUCAGACGAGCUGAUUU
DUSP6-R	CTTACTGAAGCCACCTTCCAGG									AUCAGCUCGUCUGAACCUCUU
TNFRSF10B-F	CCCTGTTCTCTCTCAGGCATC								siLSD1	CAAAGGAUGGGAUUUGGCAACCGGA
TNFRSF10B-R	CAGGTCGTTGTGAGCTTCTGT
									sh-LINC00152 F		CACCGCACACTTGATCGAATAT
GADD45G-F	GTCTTGAACGTGGACCCCGA										GACATTCAAGAGATGTCATATTC
GADD45G-R	CAGAAAGCCTGGATCAGCGTA										GATCAAGTGTGTTTTTTG
									sh-LINC00152 R		GATCCAAAAAACACACTTGATCGA
CLDN1-F	CCCAGTCAATGCCAGGTACG										ATATGACATCTCTTGAATGTCATATTC
CLDN1-R	CAAAGTAGGGCACCTCCCAG										GATCAAGTGTGC
P15-F	CTAGTGGAGAAGGTGCGACAG
P15-R	CATCATCATGACCTGGATCGC
SPRY4-F	TCTGACCAACGGCTCTTAGAC
SPRY4-R	GTGCCATAGTTGACCAGAGTC
IL-24-F	TTGCCTGGGTTTTACCCTGC
IL-24-R	AAGGCTTCCCACAGTTTCTGG
VDR F	CAGAGTTGCTATTGGCGGGA
VDR R	GACAGAACAGTGGCTGAGGG
ACSL5 F	CGACTTTGAGCCCTCGGTTA
ACSL5 R	AAGCGTGCTCCCAAAGAAGT
